# 1 Identifying Parkinson's disease and parkinsonism cases using 2 routinely-collected healthcare data: a systematic review

3  
4 Authors: Zoe Harding<sup>1†</sup>, Tim Wilkinson<sup>2,3†\*</sup>, Anna Stevenson<sup>4,5</sup>, Sophie Horrocks<sup>1</sup>, Amanda  
5 Ly<sup>3</sup>, Christian Schnier<sup>3</sup>, David P Breen<sup>6</sup>, Kristiina Rannikmäe<sup>2,3</sup>, Cathie LM Sudlow<sup>2,3</sup>, on  
6 behalf of Dementias Platform UK

- 7  
8 1. College of Medicine & Veterinary Medicine, University of Edinburgh, Edinburgh, UK  
9 2. Centre for Clinical Brain Sciences, University of Edinburgh, Edinburgh, UK  
10 3. Centre for Medical Informatics, Usher Institute of Population Health Sciences and  
11 Informatics, University of Edinburgh, Edinburgh, UK  
12 4. Institute of Genetics and Molecular Medicine, University of Edinburgh, Edinburgh, UK  
13 5. Centre for Cognitive Ageing and Cognitive Epidemiology, Edinburgh, UK  
14 6. Edmond J. Safra Program in Parkinson's Disease and the Morton and Gloria Shulman  
15 Movement Disorders Clinic, Toronto Western Hospital, Toronto, Canada

16  
17 \*Corresponding author.

18 Email: [tim.wilkinson@ed.ac.uk](mailto:tim.wilkinson@ed.ac.uk)

19 †ZH and TW are joint first authors

## 24 **Abstract**

25 **Background:** Population-based, prospective studies can provide important insights into  
26 Parkinson's disease (PD) and other parkinsonian disorders. Participant follow-up in such  
27 studies is often achieved through linkage to routinely-collected healthcare datasets. We  
28 systematically reviewed the published literature on the accuracy of these datasets for this  
29 purpose.

30 **Methods:** We searched four electronic databases for published studies that compared PD  
31 and parkinsonism cases identified using routinely-collected data to a reference standard.  
32 We extracted study characteristics and two accuracy measures: positive predictive value  
33 (PPV) and/or sensitivity.

34 **Results:** We identified 18 articles, resulting in 27 measures of PPV and 14 of sensitivity. For  
35 PD, PPVs ranged from 56-90% in hospital datasets, 53-87% in prescription datasets, 81-90%  
36 in primary care datasets and was 67% in mortality datasets. Combining diagnostic and  
37 medication codes increased PPV. For parkinsonism, PPVs ranged from 36-88% in hospital  
38 datasets, 40-74% in prescription datasets, and was 94% in mortality datasets. Sensitivities  
39 ranged from 15-73% in single datasets for PD and 43-63% in single datasets for  
40 parkinsonism.

41 **Conclusions:** In many settings, routinely-collected datasets generate good PPVs and  
42 reasonable sensitivities for identifying PD and parkinsonism cases. Further research is  
43 warranted to investigate primary care and medication datasets, and to develop algorithms  
44 that balance a high PPV with acceptable sensitivity.

45

46

## 47 **Introduction**

48 Despite well-established pathological features, the aetiologies of Parkinson's Disease (PD)  
49 and other parkinsonian conditions remain poorly understood and disease-modifying  
50 treatments have proved elusive. Large, prospective, population-based cohort studies with  
51 biosample collections (e.g., UK Biobank, German National Cohort, US Precision Medicine  
52 Initiative) provide a robust methodological framework with statistical power to investigate  
53 the complex interplay between genetic, environmental and lifestyle factors in the aetiology  
54 and natural history of neurological disorders such as PD and other parkinsonian disorders[1–  
55 3].

56 Linkage to routinely-collected healthcare data – which are administrative datasets  
57 collected primarily for healthcare purposes rather than to address specific research  
58 questions[4] –provides an efficient means of long term follow-up in order to identify large  
59 numbers of incident cases in such studies[1]. Furthermore, participant linkage to such  
60 datasets can be used in randomised controlled trials as a cost-effective and comprehensive  
61 method of follow-up for disease outcomes[5]. These data are coded using systems such as  
62 the International Classification of Diseases (ICD)[6], the Systematized Nomenclature of  
63 Medicine – Clinical Terms (SNOMED-CT) system[7], and the UK primary care Read system[8].

64 Before such datasets can be used to identify PD and parkinsonism cases in  
65 prospective studies, their accuracy must be determined. Important measures are the  
66 positive predictive value (PPV, the proportion of those coded positive that are true disease  
67 cases) and sensitivity (the proportion of true disease cases that are coded positive).  
68 Specificity and negative predictive value (NPV) are less relevant as specificity will be high  
69 when precise diagnostic codes are used and NPV, which is related to disease prevalence, will

70 be high in population-based studies where most individuals do not develop the disease of  
71 interest.

72 We systematically reviewed published studies evaluating the accuracy of routinely-  
73 collected healthcare data for identifying PD and parkinsonism cases.

74

75

## 76 **Methods**

### 77 **Study Protocol**

78 We prospectively published the protocol for this systematic review  
79 ([www.crd.york.ac.uk/PROSPERO](http://www.crd.york.ac.uk/PROSPERO), number: 2016:CRD42016033715)[9].

80

### 81 **Search Strategy and Eligibility Criteria**

82 We searched the electronic databases MEDLINE (Ovid), EMBASE (Ovid), CENTRAL (Cochrane  
83 Library) and Web of Science (Thomson Reuters) for articles published in any language  
84 between 01.01.1990 and 23.06.2017 that compared codes for PD or parkinsonism from  
85 routinely-collected healthcare data to a clinical expert-derived reference standard (see  
86 Supplementary File S1 for search strategy). Studies had to provide either a PPV and/or a  
87 sensitivity estimate, or sufficient raw data to calculate these. Where articles assessed more  
88 than one dataset or evaluated both PPV and sensitivity, we included these as separate  
89 studies. Hereafter we will refer to published papers as ‘articles’ and these separate analyses  
90 as ‘studies’. We chose the date limits based on our judgement that accuracy estimates from  
91 studies published prior to 1990 would have limited current applicability. We also screened  
92 bibliographies of included studies and relevant review papers to identify additional

93 publications. Studies had to have  $\geq 10$  coded cases, due to the limited precision of studies  
94 below this size. Studies reporting sensitivity values had to be population-based (i.e.  
95 community-based as opposed to hospital-based) with comprehensive attempts to detect all  
96 disease cases. Where multiple studies investigated overlapping populations, we included  
97 the study with the larger population size.

98

## 99 **Study Selection**

100 Two authors (AS and SH) independently screened all titles and abstracts generated by the  
101 search, and reviewed full text articles of all potentially eligible studies to determine if the  
102 inclusion criteria were met. In the case of disagreement or uncertainty, we reached a  
103 consensus through discussion and, where necessary, involvement of a senior third author  
104 (CLMS).

105

## 106 **Data Extraction**

107 Using a standardized form, two authors (TW and ZH) independently extracted the following  
108 data from each study: first author, year of publication, time period during which coded data  
109 were collected, country of study, study population, study size (defined as the total number  
110 of code positive cases for PPV [true positives plus false positives] and the total number of  
111 true positives for sensitivity [true positives and false negatives]), type of routine data used  
112 (e.g., hospital admissions, mortality or primary care), coding system and version used,  
113 specific codes used to identify cases, diagnostic coding position (e.g. primary or secondary  
114 position), parkinsonian subtypes investigated, and the method used to make the reference  
115 standard diagnosis.

116 We recorded the reported PPV and/or sensitivity estimates, as well as any  
117 corresponding raw data. After discussion, any remaining queries were resolved with a senior  
118 third author (CLMS). When necessary, we contacted study authors to request additional  
119 information.

120

## 121 **Quality Assessment**

122 We adapted the Quality Assessment of Diagnostic Accuracy Studies 2 (QUADAS-2)[10] tool  
123 to evaluate the risk of bias in the estimates of accuracy and any concerns about the  
124 applicability of each article to our specific research question (Supplementary Table S2). Two  
125 authors (TW and ZH) independently assigned quality ratings, with any discrepancies  
126 resolved through discussion. We performed this evaluation in the context of our specific  
127 review question and not as an indication of the overall quality of the articles.

128

## 129 **Statistical Analysis/Data Synthesis**

130 We tabulated the extracted data, and calculated 95% confidence intervals for the accuracy  
131 measures from the raw data using the Clopper-Pearson (exact) method. Due to substantial  
132 heterogeneity in study settings and methodologies, we did not perform a meta-analysis, as  
133 we considered any summary estimate to be potentially misleading. Instead, we assessed the  
134 full range of results in the context of study methodologies, populations and specific data  
135 sources. We also reported any within-study comparisons in which a single variable was  
136 changed to examine its effect on PPV or sensitivity. We performed analyses using the  
137 statistical software StatsDirect3.

138

139

## 140 **Results**

### 141 **Study Characteristics**

142 18 published articles fulfilled our inclusion criteria[11–28]. A flow diagram of the study  
143 selection process is shown in Fig 1. We obtained key additional information from the  
144 authors of two studies[20,24]. Of the 18 included articles, 13 reported PPV[11,13–24], four  
145 reported sensitivity[25–28] and one reported both[12]. Four articles contained more than  
146 one study[11–13,17]. One of these consisted of multiple sub-studies, using different  
147 methods to evaluate datasets across several countries, so we included these as six separate  
148 studies[13]. In total, there were 27 measures of PPV and 14 of sensitivity. Study  
149 characteristics are summarised in Tables 1 and 2 respectively.

150

### 151 **Fig 1: PRISMA Flow Diagram**

152

153

154

155

156

157

158

159

160

161

162 **Table 1. Characteristics of studies reporting positive predictive value, stratified by dataset type**

| First author & year of publication | Year of study | Country | Study population composition               | Study size (n)                   | Routine dataset used                        | Coding system                                                               | Codes used to identify cases                                                                                                                                           | Diagnostic coding position | Reference standard                                                      |
|------------------------------------|---------------|---------|--------------------------------------------|----------------------------------|---------------------------------------------|-----------------------------------------------------------------------------|------------------------------------------------------------------------------------------------------------------------------------------------------------------------|----------------------------|-------------------------------------------------------------------------|
| Hospital-derived datasets:         |               |         |                                            |                                  |                                             |                                                                             |                                                                                                                                                                        |                            |                                                                         |
| Butt 2014 <sup>10</sup>            | 1991-2011     | Canada  | Population of Ontario ≥20yrs               | Inpatient: 79<br>Outpatient: 435 | Hospital: inpatient<br>Hospital: outpatient | ICD-9 (pre-2002)<br>ICD-10 (post-2002)                                      | Parkinsonism: ICD-9: 332.0, 332;<br>ICD-10: G20, G21.0–0.4, G21.8–9, G22, F02.3                                                                                        | Not specified              | Medical record review                                                   |
| Feldman 2012 <sup>11</sup>         | 1964-2004     | Sweden  | Twins across Sweden >50yrs                 | PD: 72<br>Parkinsonism: 75       | Hospital: inpatient                         | ICD-7 (1961-67)<br>ICD-8 (1968-86)<br>ICD-9 (1987-96)<br>ICD-10 (1997-2009) | PD: ICD-7: 350; ICD-8: 342.00; ICD-9: 332.0; ICD-10: G20<br>Parkinsonism: ICD-8: 342.08, 342.09; ICD-9: 333.0; ICD-10: G21.4, G21.8, G21.9, G23.1, G23.2, G23.9, G25.9 | Any                        | Screening interview, medical record review and examination by physician |
| Gallo [a] 2015 <sup>12</sup>       | 1994-2010     | Sweden  | Hospital patients, EPIC study participants | 62                               | Hospital: unclear                           | ICD-9 (pre-1996)<br>ICD-10 (post-1996)                                      | PD: ICD-9: 332; ICD-10: G20, G21                                                                                                                                       | Not specified              | Medical record review                                                   |
| Gallo [b] 2015 <sup>12</sup>       | 1991-2010     | Sweden  | Hospital patients, EPIC study participants | 299                              | Hospital: inpatient and outpatient          | ICD-9<br>ICD-10                                                             | PD: ICD-9: 332; ICD-10: G20                                                                                                                                            | Not specified              | Medical record review                                                   |
| Kestenbaum 2015 <sup>13</sup>      | 2009-2014     | USA     | Tertiary referral centre patients          | 100                              | Hospital: unclear                           | ICD-9                                                                       | PD: 332.0                                                                                                                                                              | Not specified              | Medical record review                                                   |
| Swarztrauber 2005 <sup>14</sup>    | 1998-2002     | USA     | Veterans hospital patients                 | 175                              | Hospital: inpatient and outpatient          | ICD-9-CM                                                                    | Parkinsonism: 332.0, 332.1, 333.0                                                                                                                                      | Not specified              | Medical records review                                                  |
| Szumski 2009 <sup>15</sup>         | 2001-2004     | USA     | Veterans hospital patients                 | 577                              | Hospital: outpatient                        | ICD-9-CM                                                                    | PD: 332.0                                                                                                                                                              | Not specified              | Medical record review                                                   |
| Wei 2016 <sup>16</sup>             | Unclear       | USA     | Hospital patients                          | 100                              | Hospital: inpatient and outpatient          | ICD-9                                                                       | PD: 332.0                                                                                                                                                              | Not specified              | Medical records review                                                  |
| Wermuth 2015 <sup>17</sup>         | 1996-2009     | Denmark | Neurological hospital patients             | 2625                             | Hospital: inpatient and outpatient          | ICD-8<br>ICD-10                                                             | PD: ICD-8: 342, ICD-10: G20                                                                                                                                            | Primary                    | Medical record review                                                   |
| White 2007 <sup>18</sup>           | 1998-2000     | USA     | Veterans hospital patients                 | 782                              | Hospital: inpatient and outpatient          | ICD-9-CM                                                                    | Parkinsonism: 332.0, 332.1                                                                                                                                             | Any                        | Medical record review                                                   |
| Primary care-derived datasets      |               |         |                                            |                                  |                                             |                                                                             |                                                                                                                                                                        |                            |                                                                         |
| Hernán 2004 <sup>19</sup>          | 1995-2001     | UK      | GP patients                                | 106*                             | Primary care                                | Read code                                                                   | Not specified (investigated PD)                                                                                                                                        | Not applicable             | Medical record review                                                   |
| Prescription-derived datasets      |               |         |                                            |                                  |                                             |                                                                             |                                                                                                                                                                        |                            |                                                                         |
| Butt 2014 <sup>10</sup>            | 1991-2011     | Canada  | Population of Ontario ≥65                  | 395                              | Prescriptions                               | Not specified                                                               | Parkinsonism: Levodopa; MAO-B inhibitors; dopamine agonists; COMT inhibitors                                                                                           | Not applicable             | Medical record review                                                   |



|                                                                                       |                |        |                                            |                              |                                                                      |                                           |                                                                                                  |                |                                                                         |
|---------------------------------------------------------------------------------------|----------------|--------|--------------------------------------------|------------------------------|----------------------------------------------------------------------|-------------------------------------------|--------------------------------------------------------------------------------------------------|----------------|-------------------------------------------------------------------------|
| Meara 1999 <sup>20</sup>                                                              | Not stated     | UK     | GP patients                                | PD: 402<br>Parkinsonism: 402 | Prescriptions (from primary care)                                    | Not specified                             | PD: Not specified<br>Parkinsonism: Not specified                                                 | Not applicable | History and examination by physician and medical record review          |
| Wei 2016 <sup>16</sup>                                                                | Unclear        | USA    | Hospital patients                          | 100                          | Prescriptions                                                        | Not specified                             | PD: Rotigotine; Entacapone; Selegiline hydrochloride; Pergolide; Rasagiline                      | Not applicable | Medical record review                                                   |
| Mortality datasets                                                                    |                |        |                                            |                              |                                                                      |                                           |                                                                                                  |                |                                                                         |
| Feldman. A 2012 <sup>11</sup>                                                         | 1998-2007      | Sweden | Twins across Sweden >50yrs                 | PD: 18<br>Parkinsonism: 18   | Mortality                                                            | ICD-10                                    | PD: G20<br>Parkinsonism: G21.4, G21.8, G21.9, G23.1, G23.2, G23.9, G25.9                         | Any            | Screening interview, medical record review and examination by physician |
| Combined datasets (accuracy measures for constituent datasets unable to be separated) |                |        |                                            |                              |                                                                      |                                           |                                                                                                  |                |                                                                         |
| Bower 1999 <sup>21</sup>                                                              | 1976-1990      | USA    | Population of Olmsted county               | 2472                         | Synthesised medical information                                      | H-ICDA                                    | Parkinsonism: H-ICDA 53 diagnostic codes                                                         | Not specified  | Medical record review                                                   |
| Gallo [c] 2015 <sup>12</sup>                                                          | 1998-2010      | Spain  | EPIC study participants                    | 39                           | Prescriptions;<br>Primary care;<br>Mortality; Hospital: inpatient    | ATC/DDD index<br>ICD-9                    | PD: ICD-9: 332, 332.0, 332.1; ATC/DDD index N04, N04A, N04B                                      | Not specified  | Medical record review                                                   |
| Gallo [d] 2015 <sup>12</sup>                                                          | Unclear - 2010 | Spain  | EPIC study participants                    | 41                           | Primary care;<br>Prescriptions;<br>Mortality                         | ICPC<br>ATC/DDD index<br>ICD-9            | PD: ICPC N87; ATC/DDD index N04, N04A, N04B; ICD-9: 332.x                                        | Not specified  | Medical record review                                                   |
| Gallo [e] 2015 <sup>12</sup>                                                          | 1998-2010      | Spain  | EPIC study participants                    | 99                           | Hospital: inpatient;<br>Primary care;<br>Prescriptions;<br>Mortality | ICD-9<br>ICPC2<br>ATC/DDD index<br>ICD-10 | PD: ICD-9: 332; ICPC2-WICC N87; ATC/DDD index N04x; ICD-10: G20                                  | Not specified  | Medical record review                                                   |
| Gallo [f] 2015 <sup>12</sup>                                                          | 1992-2008      | Italy  | EPIC study participants                    | 81                           | Hospital: inpatient;<br>Mortality;<br>Prescriptions                  | ICD-9<br>ICD-10<br>ATC/DDD index          | PD: ICD-9 332; ATC/DDD index: N04, N04A, N04B; ICD-10 G20                                        | Not specified  | Medical record review                                                   |
| Savica 2013 <sup>22</sup>                                                             | 1991-2005      | USA    | Population of Olmsted county               | 4957                         | Synthesised medical information                                      | H-ICDA<br>ICD-9                           | Parkinsonism: H-ICDA 38 diagnostic codes, ICD-9: 331.9, 332.0, 332.1, 333.0, 333.1, 781.0, 781.3 | Not specified  | Medical record review                                                   |
| Thacker 2016 <sup>23</sup>                                                            | 2005-2015      | USA    | Patients from a single medical institution | 129                          | Hospital: inpatient and outpatient<br>Primary care                   | ICD-9                                     | PD: 332, 332.0                                                                                   | Primary        | Medical records review                                                  |

163 Year of study: the time period during which coded data was collected. Study size: the total number of code positive cases (true positives plus  
164 false positives). Where both PD and parkinsonism were investigated in one article, study sizes for both are displayed. Study population  
165 composition: population cohort from which cases were identified.  
166 ICD codes for Parkinson's disease - ICD-7 350; ICD-8 342.00; ICD-9(-CM) 332.0; ICD-10 G20.  
167 ICD codes for other Parkinsonism - ICD-8: 342.08 (other defined Parkinsonism), 342.09 (unspecified Parkinsonism); ICD-9(-CM): ICD-9-CM:  
168 332.1 (secondary Parkinson's disease), 333.0 (other degenerative diseases of the basal ganglia); ICD-10: G21.4 (vascular Parkinsonism), G21.8  
169 (other defined secondary Parkinsonism), G21.9 (unspecified secondary Parkinsonism), G23.1 (progressive supranuclear ophthalmoplegia),  
170 G23.2 (striatonigral degeneration), G23.9 (unspecified degenerative disease of basal ganglia), G25.9 (unspecified extrapyramidal and

171 movement disorder). Additional ICD codes – ICD-9: 331.9 (cerebral degeneration), 333.1 (essential and other specified forms of tremor), 781.0  
172 (abnormal involuntary movements), 781.3 (lack of coordination).

173 + Exact study size unknown, reported as 7% of 1521 (could range from 99-115) – authors contacted, but data unavailable.

174 Abbreviations: PD - Parkinson's Disease; EPIC - European Prospective Investigation into Cancer and Nutrition study; ICD- International  
175 Classification of Diseases; H-ICDA - Hospital Adaptation of ICDA; ATC/DDD index - Anatomical Therapeutic Chemical Classification System with  
176 Defined Daily Doses; ICPC - International Classification of Primary Care.

177

178

179

180

181

182

183

184

185

186

187

188

189

190 **Table 2. Characteristics of studies reporting sensitivity, stratified by dataset type**

| First author, year of publication       | Year of study | Country | Study population composition     | Study size (n)               | Routine dataset used | Coding system                                                               | Codes used to identify cases                                                                                                                                           | Diagnostic coding position | Reference standard                                                                   |
|-----------------------------------------|---------------|---------|----------------------------------|------------------------------|----------------------|-----------------------------------------------------------------------------|------------------------------------------------------------------------------------------------------------------------------------------------------------------------|----------------------------|--------------------------------------------------------------------------------------|
| Mortality certificate-derived datasets: |               |         |                                  |                              |                      |                                                                             |                                                                                                                                                                        |                            |                                                                                      |
| Benito-León 2014 <sup>24</sup>          | 1994-2007     | Spain   | Three communities near Madrid    | 82                           | Mortality            | ICD-9 (pre 1999)<br>ICD-10 (post 1999)                                      | Not specified (investigated PD)                                                                                                                                        | Primary                    | Screening (in-person, telephone and mail questionnaire) and neurological examination |
| Beyer 2001 <sup>25</sup>                | 1993-1996     | Norway  | County (Rogaland)                | 84                           | Mortality            | ICD-9 or ICPC                                                               | Not specified (investigated PD)                                                                                                                                        | Primary + Any              | Semi-structured interview and a clinical examination                                 |
| Fall 2003 <sup>26</sup>                 | 1989-1998     | Sweden  | Central district of Östergötland | 121                          | Mortality            | ICD-9                                                                       | Not specified (investigated PD)                                                                                                                                        | Primary + Any              | Examination and medical record review                                                |
| Feldman 2012 <sup>11</sup>              | 1998-2008     | Sweden  | Twins across Sweden >50yrs       | Parkinsonism: 127<br>PD: 77  | Mortality            | ICD-10                                                                      | PD: G20<br>Parkinsonism: G21.4, G21.8, G21.9, G23.1, G23.2, G23.9, G25.9                                                                                               | Any                        | Screening interview, medical record review and examination                           |
| Williams-Gray 2013 <sup>27</sup>        | 2000-2012     | UK      | County (Cambridgeshire)          | 63                           | Mortality            | Not specified                                                               | Not specified (investigated PD)                                                                                                                                        | Primary + Any              | History and neurological examination                                                 |
| Hospital-derived datasets:              |               |         |                                  |                              |                      |                                                                             |                                                                                                                                                                        |                            |                                                                                      |
| Feldman 2012 <sup>11</sup>              | 1964-2009     | Sweden  | Twins across Sweden >50yrs       | Parkinsonism: 194<br>PD: 132 | Hospital: inpatient  | ICD-7 (1961-67)<br>ICD-8 (1968-86)<br>ICD-9 (1987-96)<br>ICD-10 (1997-2009) | PD: ICD-7: 350; ICD-8: 342.00; ICD-9: 332.0; ICD-10: G20<br>Parkinsonism: ICD-8: 342.08, 342.09; ICD-9: 333.0; ICD-10: G21.4, G21.8, G21.9, G23.1, G23.2, G23.9, G25.9 | Any                        | Screening interview, medical record review and examination                           |

191 Year of study: the time period during which coded data was collected. Study size: the total number of true positive according to the reference  
 192 standard (true positives and false negatives). Where both PD and parkinsonism were investigated in one article, study sizes for both are  
 193 displayed. Study population composition: population cohort from which cases were identified.  
 194 ICD codes for Parkinson’s disease - ICD-7 350; ICD-8 342.00; ICD-9 332.0; ICD-10 G20.  
 195 ICD codes for other Parkinsonism - ICD-8: 342.08 (other defined Parkinsonism), 342.09 (unspecified Parkinsonism); ICD-9: 333.0 (other  
 196 degenerative diseases of the basal ganglia); ICD-10: G21.4 (vascular Parkinsonism), G21.8 (other defined secondary Parkinsonism), G21.9  
 197 (unspecified secondary Parkinsonism), G23.1 (progressive supranuclear ophthalmoplegia), G23.2 (striatonigral degeneration), G23.9  
 198 (unspecified degenerative disease of basal ganglia), G25.9 (unspecified extrapyramidal and movement disorder)  
 199

200 Study size varied considerably, ranging from 39-4957. All 18 articles were based in  
201 high-income countries. Three were from the UK[20,21,28], six from mainland  
202 Europe[12,13,18,25–27], eight from the USA[14–17,19,22–24], and one from Canada[11].  
203 There were 12 PPV estimates and two sensitivity estimates from hospital data[11–19], two  
204 PPV and 10 sensitivity estimates from mortality data[12,25–28], two PPV estimates from  
205 primary care data[20], four PPV estimates from prescription data[11,17,21] and seven PPV  
206 estimates and two sensitivity estimates from combining datasets from different  
207 sources[12,13,22–24]. There were no sensitivity estimates from primary care or prescription  
208 data.

209 PD was evaluated in 13 articles, with eight estimating PPV[13,14,16–18,20,21,24],  
210 four estimating sensitivity[25–28] and one estimating both[12]. Parkinsonism was evaluated  
211 by seven articles, of which six estimated PPV[11,15,19,21–23] and one assessed both PPV  
212 and sensitivity[12]. All of the parkinsonism articles combined PD with other causes of  
213 parkinsonism.

214 The methods of reference standard used could be broadly divided into two  
215 categories: patient history and examination (majority of studies reporting sensitivity) and  
216 medical record review (majority of studies reporting PPV). In addition, where entire  
217 populations were under study, some studies incorporated a screening method (e.g.,  
218 telephone interview) to identify potential cases[12,25].

219 Where reported, codes used to identify PD cases were consistent and appropriate to  
220 the ICD version used. However, the range of codes used to identify other parkinsonian  
221 conditions varied considerably, reflecting the broad range of pathologies that can lead to  
222 parkinsonism. Seven studies did not specify the exact codes used[17,20,21,25–28]. ICD  
223 versions used reflected the time period over which the studies were conducted. 19 studies

224 used ICD-9 (or ICD-9-CM, a clinically modified version used in the USA, and identical to ICD-9  
225 with respect to parkinsonian diagnoses)[11–17,19,23–27], 11 used ICD-10[11–13,18,25],  
226 three used ICD-8[12,18], and two used ICD-7[12]. One of the primary care studies used  
227 Read-coded data[20]. Four studies, including the three that evaluated prescription data, did  
228 not specify the coding system used[11,17,21,28].

229 The diagnostic coding position assessed also varied. Three studies assessed primary  
230 diagnoses alone[18,24,25], eight used any diagnostic position[12,19,26–28], while 13 did  
231 not specify the coding position[11,13–17,22,23]. Diagnostic position was not applicable in  
232 the studies of primary care and prescription data due to the nature of these  
233 datasets[11,17,20,21].

234

## 235 **Quality Assessment**

236 Only two articles were judged to be of low risk of bias or applicability concerns in the  
237 QUADAS-2 assessment[11,12] (Supplementary Table S3). The commonest concerns were:  
238 selection bias, lack of reporting of the codes used to identify disease cases, insufficiently  
239 rigorous reference standards, inappropriate inclusions and exclusions, or patients being lost  
240 to follow-up.

241

## 242 **Positive predictive value**

243 For PD, there were 17 PPV estimates in total (Fig 2)[12–14,16–18,20,21,24]. These  
244 comprised seven PPV estimates of hospital data alone[12–14,16–18], one of mortality data  
245 alone[12], two for prescription data alone[17,21], one of primary care data alone[20], one  
246 of prescription data and primary care data in combination[20], and five of datasets used in  
247 combination[13,24]. PPVs ranged from 36-90% across all studies. Nine of the 17 estimates

248 were >75%. The single study of Read coding in primary care data alone reported a PPV of  
249 81%, increasing to 90% with the presence of a relevant medication code in addition to a  
250 diagnostic code[20]. The two studies of medication data alone reported PPVs of 53% and  
251 87%[17,21]. The single, small study of mortality data had a PPV of 67%[12].

252

253

## 254 **Fig 2: Positive predictive values (PPVs) of coded diagnoses**

255 Study size: total number of code-positive cases (true positives + false positives). \*Exact  
256 sample size unknown, most conservative estimate used. Box sizes reflect Mantel-Haenszel  
257 weight of study (inverse variance, fixed effects).

258

259

260 Several within-study comparisons were available from three studies identifying PD  
261 (Table 3)[12,16,17]. Two of these investigated the change in PPV for hospital data to identify  
262 PD when algorithms containing additional criteria were used[12,16]. Both showed a  
263 moderate increase in PPV if a relevant diagnosis code was recorded more than once, or if a  
264 specialist department assigned such a code. One study reported an increase in PPV when  
265 only primary position diagnoses were assessed[12]. Another showed that incorporating  
266 selected medication codes with diagnosis codes increased the PPV from 76% to 86%,  
267 although this was at the expense of reduced case ascertainment[16]. Finally, one study  
268 showed that the combination of a diagnostic code in hospital data with a relevant  
269 medication code increased the PPV when compared to using either dataset alone (94%  
270 versus 87% and 89% respectively)[17].

271 For parkinsonism there were 10 PPV estimates in total (Fig 2)[11,12,15,19,21–23].  
272 These comprised five estimates from hospital data alone[11,12,15,19], two from  
273 prescription data alone[11,21], one from mortality data alone[12], and two from using  
274 datasets in combination[22,23]. PPVs ranged from 40-94% in the single datasets and from  
275 22-28% in the combination datasets. The two studies of parkinsonism in prescription data  
276 produced very different PPV estimates of 40% and 74%[11,21]. One of these studies  
277 reported that the PPV of medication data to identify any parkinsonian disorder was  
278 considerably higher than that for PD (74% and 53% respectively)[21].

279

280

281

282

283

284

285

286

287

288

289

290

291

292

293

294

| Criteria applied:                                                             | PPV (95% CI) | Number of cases identified |
|-------------------------------------------------------------------------------|--------------|----------------------------|
| <b>Parkinson's Disease</b>                                                    |              |                            |
| <b>a) Feldman 2012</b> (hospital inpatient data)                              |              |                            |
| Parkinson's disease ICD code only                                             | 71 (59-81)   | 72                         |
| Exclusion of patients with other (non-Parkinson's disease) parkinsonian codes | 70 (58-81)   | 67                         |
| Code frequency $\geq 2$ hospital admissions                                   | 76 (61-88)   | 42                         |
| Code in primary diagnostic position                                           | 83 (70-92)   | 53                         |
| Code assigned in specialist department (neurological/neurosurgical/geriatric) | 83(63-95)    | 24                         |
| <b>b) Szumski 2009</b> (hospital outpatient data)                             |              |                            |
| Parkinson's disease ICD codes only                                            | 76 (72-79)   | 579                        |
| Code frequency $\geq 2$ at any clinic                                         | 79(76-83)    | 409                        |
| Code assigned in any neurology clinic                                         | 79 (75-83)   | 352                        |
| Code assigned in movement disorder speciality clinic                          | 87 (81-92)   | 177                        |
| Code + prescribed antiparkinsonian medication                                 | 86 (82-89)   | 408                        |
| <b>c) Wei 2016</b>                                                            |              |                            |
| Parkinson's disease ICD codes only                                            | 89 (81-94)   | 100                        |
| Prescription only                                                             | 87 (78-93)   | 100                        |
| ICD code and prescription                                                     | 94*          | Unknown*                   |
| <b>Parkinsonism</b>                                                           |              |                            |
| <b>d) Butt 2014</b> <sup>†</sup>                                              |              |                            |
| Hospital inpatient ICD code ever                                              | 87 (79-96)   | 63                         |
| Hospital outpatient ICD code ever                                             | 55 (49-60)   | 297                        |
| Prescription ever                                                             | 40 (35-44)   | 395                        |
| Outpatient code frequency $\geq 2$ in one year                                | 83 (77-89)   | 169                        |
| Outpatient code frequency $\geq 2$ in one year by a specialist                | 87 (81-92)   | 134                        |
| Outpatient code AND Prescription                                              | 85 (79-90)   | 174                        |
| Prescription AND outpatient code within +/- 6 months                          | 87 (82-92)   | 166                        |

295 **Table 3: Within-study analyses: algorithm development**

296 The effect of additional criteria to identify PD cases on PPV and the number of cases

297 identified. \* Sample size and confidence intervals unknown for this accuracy measure.



298

## 299 **Sensitivity**

300 For PD, there were 11 sensitivity estimates in total (Fig 3)[12,25–28]. Of these, nine were  
301 sensitivity estimates for mortality data alone, consistently showing that codes in the primary  
302 position only gave low sensitivities of 11-23%, rising to 53-60% when codes from any  
303 position were included[12,25–28]. A single study reported the sensitivity of hospital data to  
304 be 73%, increasing to 83% when hospital and mortality data were combined. There were no  
305 sensitivity estimates for primary care or prescription data.

306 For parkinsonism, there were three sensitivity estimates, all from one study[12].  
307 Hospital admissions and mortality data combined gave higher sensitivity (71%) compared  
308 with either mortality or hospital data alone (43% and 63% respectively).

309

310

### 311 **Fig 3: Sensitivity estimates of coded diagnoses**

312 Study size: total number of true positives according to reference standard (true positives +  
313 false negatives). \*Unknown sample size and confidence intervals. Box sizes reflect Mantel-  
314 Haenszel weight of study (inverse variance, fixed effects).

315

316

317

318

319

320

## 321 Discussion

322 We have demonstrated that existing validation studies show a wide variation in the  
323 accuracy of routinely-collected healthcare data for the identification of PD and parkinsonism  
324 cases. Despite this, in the right setting, achieving high PPVs is possible. Sensitivity is  
325 generally lower than PPV, but is increased by combining data sources.

326 False positives (participants who receive a disease code but do not have the  
327 disorder) may arise in routinely-collected coded datasets for several reasons. Firstly, the  
328 clinician may incorrectly diagnose the condition. Given that PD and other parkinsonian  
329 disorders are largely clinical diagnoses made without a definitive diagnostic test, there is the  
330 potential for diagnostic inaccuracies. Clinicopathological studies have shown discrepancies  
331 between clinical diagnoses in life and neuropathological confirmation[29] and there is  
332 evidence that accuracy increases when diagnoses are made by movement disorder  
333 specialists[30–32]. Secondly, diagnoses may be incorrectly recorded in medical records, or  
334 errors may arise during the coding process. Similarly, false negatives (patients who have the  
335 condition but do not receive a code) may arise due to under-diagnosis, omission of the  
336 diagnosis from the medical records (e.g., because the condition is not the primary reason for  
337 hospital admission), or errors during the coding process.

338 The pharmacological treatment of PD is largely focussed on improving motor  
339 function and patients are treated with a limited number of drugs. This has allowed  
340 antiparkinsonian drugs to be used as ‘tracers’ in epidemiological studies[33,34]. There are  
341 potential problems with using prescription data as a proxy for PD diagnosis. This approach  
342 may disproportionately under-identify patients with early stage disease who do not yet  
343 require treatment. Also, a response to a trial of dopaminergic drugs may be used as part of

344 the diagnostic assessment in potential PD cases, meaning some patients prescribed  
345 antiparkinsonian medications will not be subsequently diagnosed with PD. Furthermore,  
346 antiparkinsonian can be prescribed for indications other than PD (such as dopamine  
347 agonists for restless legs syndrome, endocrine disorders and other forms of parkinsonism).  
348 The specific drugs licensed for use in parkinsonian conditions varies between countries and  
349 may change over time. Therefore, an algorithm incorporating prescription data would need  
350 to be continually revised to match prescribing patterns. Results from our review suggest  
351 that prescription data alone has a low PPV for PD case ascertainment[21]; however, when  
352 drug codes are combined with diagnostic codes, PPV increases but with reduced case  
353 ascertainment[16,20]. Furthermore, prescription datasets appear to have a higher PPV  
354 when identifying any parkinsonian disorder rather than specifically PD[21].

355

356 This study has several strengths and limitations. Our review benefits from prospective  
357 protocol publication, comprehensive search criteria, and independent duplication of each  
358 stage by two authors. Despite this, relevant studies may still have been missed, especially if  
359 a validation study was a subsection of a paper with a wider aim. As all eligible studies were  
360 included, the results may have been influenced by studies of lower quality. Only two articles  
361 were found to be at low risk of bias or applicability concerns[11,12], and it is likely that  
362 biases in study design would have affected the results. For example, one study with the  
363 lowest PPV[23] used very broad ICD-9 codes such as 781.0 (abnormal involuntary  
364 movements) and 781.3 (lack of coordination).

365         Since there is no method of diagnosing PD with certainty in life, there is likely to be  
366 some misclassification of the reference standards used in the studies. The application of  
367 stringent diagnostic criteria to reference standard diagnoses, although often necessary for

368 research purposes, may lead to some patients being misclassified as ‘false positives’ when  
369 they do in fact have the condition. This may lead to underestimation of the PPV in some of  
370 the studies. When considering the ideal reference standard for validation studies, there is a  
371 trade-off between the robustness of the reference standard and validating sufficient cases  
372 to produce precise accuracy estimates. For example, in-person neurological examination  
373 may have greater diagnostic certainty than medical record review but this becomes difficult  
374 as the cohort size increases.

375           Many of the studies reported cases with insufficient information to meet the  
376 reference standard and the handling of these varied. Some studies excluded such cases,  
377 others classified them as false positives, while some did not specify how they handled such  
378 missing data. Excluding such cases may introduce selection bias, whereas counting them as  
379 false positives may underestimate PPV.

380           The effect of possible publication bias on the results is difficult to estimate, but  
381 disproportionate publication of studies which report more favourable accuracy measures  
382 may lead to over-estimation of the performance of the codes. In addition, estimates of PPV  
383 are dependent upon the prevalence of the condition in the study population but it was not  
384 possible to assess the prevalence of PD within each study population.

385

386 Our review highlights several areas requiring further research. Given that the management  
387 of PD is largely delivered in outpatients or the community, primary care data may be an  
388 effective method of identifying cases. Whilst studies have suggested that PD diagnoses  
389 made in primary care are less accurate than those made in a specialist setting[35,36],  
390 primary care records combine notes made by primary care clinicians with prescription  
391 records and correspondence from secondary care. Codes from primary care should

392 therefore include diagnoses made by specialists, thus increasing their accuracy. We found  
393 only one small study of primary care data, reporting a promising PPV of 81%, improving to  
394 90% with the inclusion of medication codes[20]. No studies investigated the sensitivity of  
395 primary care data. Further research into the accuracy of primary care data is needed.

396 Two studies investigated using algorithmic combinations of codes from different  
397 sources to improve PPV[12,16]. These investigated the additional benefit of the inclusion of  
398 factors such as only including codes that appeared more than once, selecting codes in the  
399 primary position only, combining diagnostic codes with prescription data, and only including  
400 diagnoses made in specialist clinics. These methods increased PPV but at a cost to the  
401 number of cases identified. The development of algorithms that maximize PPV whilst  
402 maintaining a reasonable sensitivity (e.g., by combining multiple complimentary datasets)  
403 merits further evaluation.

404 To our knowledge, no studies have evaluated the accuracy of routinely-collected  
405 healthcare data for solely identifying atypical parkinsonian syndromes such as PSP and MSA.  
406 Further work is needed to understand whether these datasets provide a valuable resource  
407 for studying these less common diseases.

408  
409 In conclusion, our review summarises existing knowledge of the accuracy of routinely-  
410 collected healthcare data for identifying PD and parkinsonism, and highlights approaches to  
411 increase accuracy and areas where further research is required. Given the wide range of  
412 results observed, prospective cohorts may wish to perform their own validation studies  
413 based on their specific setting and research question.

414

415

## 416 Acknowledgements

417 The UK Biobank Neurodegenerative Outcomes Working Group provided feedback on the  
418 manuscript. This work was conducted on behalf of Dementias Platform UK  
419 ([www.dementiasplatform.uk/](http://www.dementiasplatform.uk/))

420

421

## 422 References

- 423 1. Sudlow C, Gallacher J, Allen N, Beral V, Burton P, Danesh J, et al. UK biobank: an open  
424 access resource for identifying the causes of a wide range of complex diseases of middle  
425 and old age. *PLoS Med.* 2015;12: e1001779. doi:10.1371/journal.pmed.1001779
- 426 2. German National Cohort (GNC) Consortium. The German National Cohort: aims, study  
427 design and organization. *Eur J Epidemiol.* 2014;29: 371–382. doi:10.1007/s10654-014-  
428 9890-7
- 429 3. Jaffe S. Planning for US Precision Medicine Initiative underway. *The Lancet.* 2015;385:  
430 2448–2449. doi:10.1016/S0140-6736(15)61124-2
- 431 4. Benchimol EI, Smeeth L, Guttman A, Harron K, Moher D, Petersen I, et al. The  
432 REporting of studies Conducted using Observational Routinely-collected health Data  
433 (RECORD) Statement. *PLOS Med.* 2015;12: e1001885.  
434 doi:10.1371/journal.pmed.1001885
- 435 5. Mc Cord KA, Al-Shahi Salman R, Treweek S, Gardner H, Strech D, Whiteley W, et al.  
436 Routinely collected data for randomized trials: promises, barriers, and implications.  
437 *Trials.* 2018;19: 29. doi:10.1186/s13063-017-2394-5
- 438 6. World Health Organization. The ICD-10 classification of mental and behavioural  
439 disorders: clinical descriptions and diagnostic guidelines. Geneva: World Health  
440 Organization; 1992.
- 441 7. SNOMED International. SNOMED CT [Internet]. [cited 18 May 2017]. Available:  
442 <http://www.snomed.org/snomed-ct>
- 443 8. NHS Digital. Read Codes [Internet]. [cited 17 May 2017]. Available:  
444 <https://digital.nhs.uk/article/1104/Read-Codes>
- 445 9. Stevenson A, Wilkinson T, Sudlow CLM, Ly A. The accuracy of electronic health datasets  
446 in identifying Parkinson’s disease cases: a systematic review [Internet]. 28 Jan 2016

- 447 [cited 17 May 2017]. Available:  
448 [http://www.crd.york.ac.uk/PROSPERO/display\\_record.asp?ID=CRD42016033715](http://www.crd.york.ac.uk/PROSPERO/display_record.asp?ID=CRD42016033715)
- 449 10. Whiting PF, Rutjes AWS, Westwood ME, Mallett S, Deeks JJ, Reitsma JB, et al. QUADAS-  
450 2: a revised tool for the quality assessment of diagnostic accuracy studies. *Ann Intern*  
451 *Med*. 2011;155: 529–536. doi:10.7326/0003-4819-155-8-201110180-00009
- 452 11. Butt DA, Tu K, Young J, Green D, Wang M, Ivers N, et al. A validation study of  
453 administrative data algorithms to identify patients with Parkinsonism with prevalence  
454 and incidence trends. *Neuroepidemiology*. 2014;43: 28–37. doi:10.1159/000365590
- 455 12. Feldman AL, Johansson ALV, Gatz M, Flensburg M, Petzinger GM, Widner H, et al.  
456 Accuracy and sensitivity of Parkinsonian disorder diagnoses in two Swedish national  
457 health registers. *Neuroepidemiology*. 2012;38: 186–193. doi:10.1159/000336356
- 458 13. Gallo V, Brayne C, Forsgren L, Barker RA, Petersson J, Hansson O, et al. Parkinson’s  
459 Disease Case Ascertainment in the EPIC Cohort: The NeuroEPIC4PD Study.  
460 *Neurodegener Dis*. 2015;15: 331–338. doi:10.1159/000381857
- 461 14. Kestenbaum M, Ford B, Louis ED. Estimating the Proportion of Essential Tremor and  
462 Parkinson’s Disease Patients Undergoing Deep Brain Stimulation Surgery: Five-Year Data  
463 From Columbia University Medical Center (2009–2014). *Mov Disord Clin Pract*. 2015;2:  
464 384–387. doi:10.1002/mdc3.12185
- 465 15. Swartztrauber K, Anau J, Peters D. Identifying and distinguishing cases of parkinsonism  
466 and Parkinson’s disease using ICD-9 CM codes and pharmacy data. *Mov Disord*. 2005;20:  
467 964–970. doi:10.1002/mds.20479
- 468 16. Szumski NR, Cheng EM. Optimizing algorithms to identify Parkinson’s disease cases  
469 within an administrative database. *Mov Disord*. 2009;24: 51–56.  
470 doi:10.1002/mds.22283
- 471 17. Wei W-Q, Teixeira PL, Mo H, Cronin RM, Warner JL, Denny JC. Combining billing codes,  
472 clinical notes, and medications from electronic health records provides superior  
473 phenotyping performance. *J Am Med Inform Assoc*. 2016;23: e20-27.  
474 doi:10.1093/jamia/ocv130
- 475 18. Wermuth L, Cui X, Greene N, Schernhammer E, Ritz B. Medical Record Review to  
476 Differentiate between Idiopathic Parkinson’s Disease and Parkinsonism: A Danish  
477 Record Linkage Study with 10 Years of Follow-Up. *Parkinsons Dis*. 2015;2015: 781479.  
478 doi:10.1155/2015/781479
- 479 19. White D, Moore S, Waring S, Cook K, Lai E. Identifying incident cases of parkinsonism  
480 among veterans using a tertiary medical center. *Mov Disord*. 2007;22: 915–923.  
481 doi:10.1002/mds.21353
- 482 20. Hernán MA, Logroscino G, Rodríguez LAG. A prospective study of alcoholism and the risk  
483 of Parkinson’s disease. *J Neurol*. 2004;251 Suppl 7: vii14-17. doi:10.1007/s00415-004-  
484 1705-4

- 485 21. Meara J, Bhowmick BK, Hobson P. Accuracy of diagnosis in patients with presumed  
486 Parkinson's disease. *Age Ageing*. 1999;28: 99–102.
- 487 22. Bower JH, Maraganore DM, McDonnell SK, Rocca WA. Incidence and distribution of  
488 parkinsonism in Olmsted County, Minnesota, 1976-1990. *Neurology*. 1999;52: 1214–  
489 1220.
- 490 23. Savica R, Grossardt BR, Bower JH, Ahlskog JE, Rocca WA. Incidence and pathology of  
491 synucleinopathies and tauopathies related to parkinsonism. *JAMA Neurol*. 2013;70:  
492 859–866. doi:10.1001/jamaneurol.2013.114
- 493 24. Thacker T, Wegele AR, Pirio Richardson S. Utility of electronic medical record for  
494 recruitment in clinical research: from rare to common disease. *Mov Disord Clin Pract*.  
495 2016;3: 507–509. doi:10.1002/mdc3.12318
- 496 25. Benito-León J, Louis ED, Villarejo-Galende A, Romero JP, Bermejo-Pareja F. Under-  
497 reporting of Parkinson's disease on death certificates: a population-based study  
498 (NEDICES). *J Neurol Sci*. 2014;347: 188–192. doi:10.1016/j.jns.2014.08.048
- 499 26. Beyer MK, Herlofson K, Arslan D, Larsen JP. Causes of death in a community-based  
500 study of Parkinson's disease. *Acta Neurol Scand*. 2001;103: 7–11.
- 501 27. Fall P-A, Saleh A, Fredrickson M, Olsson J-E, Granérus A-K. Survival time, mortality, and  
502 cause of death in elderly patients with Parkinson's disease: a 9-year follow-up. *Mov*  
503 *Disord*. 2003;18: 1312–1316. doi:10.1002/mds.10537
- 504 28. Williams-Gray CH, Mason SL, Evans JR, Foltynie T, Brayne C, Robbins TW, et al. The  
505 CamPaIGN study of Parkinson's disease: 10-year outlook in an incident population-  
506 based cohort. *J Neurol Neurosurg Psychiatr*. 2013;84: 1258–1264. doi:10.1136/jnnp-  
507 2013-305277
- 508 29. Adler CH, Beach TG, Hentz JG, Shill HA, Caviness JN, Driver-Dunckley E, et al. Low clinical  
509 diagnostic accuracy of early vs advanced Parkinson disease: clinicopathologic study.  
510 *Neurology*. 2014;83: 406–412. doi:10.1212/WNL.0000000000000641
- 511 30. Hughes AJ, Daniel SE, Kilford L, Lees AJ. Accuracy of clinical diagnosis of idiopathic  
512 Parkinson's disease: a clinico-pathological study of 100 cases. *J Neurol Neurosurg*  
513 *Psychiatr*. 1992;55: 181–184.
- 514 31. Hughes AJ, Daniel SE, Lees AJ. Improved accuracy of clinical diagnosis of Lewy body  
515 Parkinson's disease. *Neurology*. 2001;57: 1497–1499.
- 516 32. Hughes AJ, Daniel SE, Ben-Shlomo Y, Lees AJ. The accuracy of diagnosis of parkinsonian  
517 syndromes in a specialist movement disorder service. *Brain*. 2002;125: 861–870.
- 518 33. Brandt-Christensen M, Kvist K, Nilsson FM, Andersen PK, Kessing LV. Use of  
519 antiparkinsonian drugs in Denmark: results from a nationwide pharmacoepidemiological  
520 study. *Mov Disord*. 2006;21: 1221–1225. doi:10.1002/mds.20907



- 521 34. Chiò A, Magnani C, Schiffer D. Prevalence of Parkinson's disease in Northwestern Italy:  
522 comparison of tracer methodology and clinical ascertainment of cases. *Mov Disord.*  
523 1998;13: 400–405. doi:10.1002/mds.870130305
- 524 35. Newman EJ, Breen K, Patterson J, Hadley DM, Grosset KA, Grosset DG. Accuracy of  
525 Parkinson's disease diagnosis in 610 general practice patients in the West of Scotland.  
526 *Mov Disord.* 2009;24: 2379–2385. doi:10.1002/mds.22829
- 527 36. Schrag A, Ben-Shlomo Y, Quinn N. How valid is the clinical diagnosis of Parkinson's  
528 disease in the community? *J Neurol Neurosurg Psychiatr.* 2002;73: 529–534.

529

## 530 **Supporting information**

531 **S1 File. Search strategy.**

532

533 **S2 File. QUADAS-2 assessment.**

534

535 **S3 Table. QUADAS-2 summary results.**

536

537 **S4 Checklist. PRISMA checklist.**

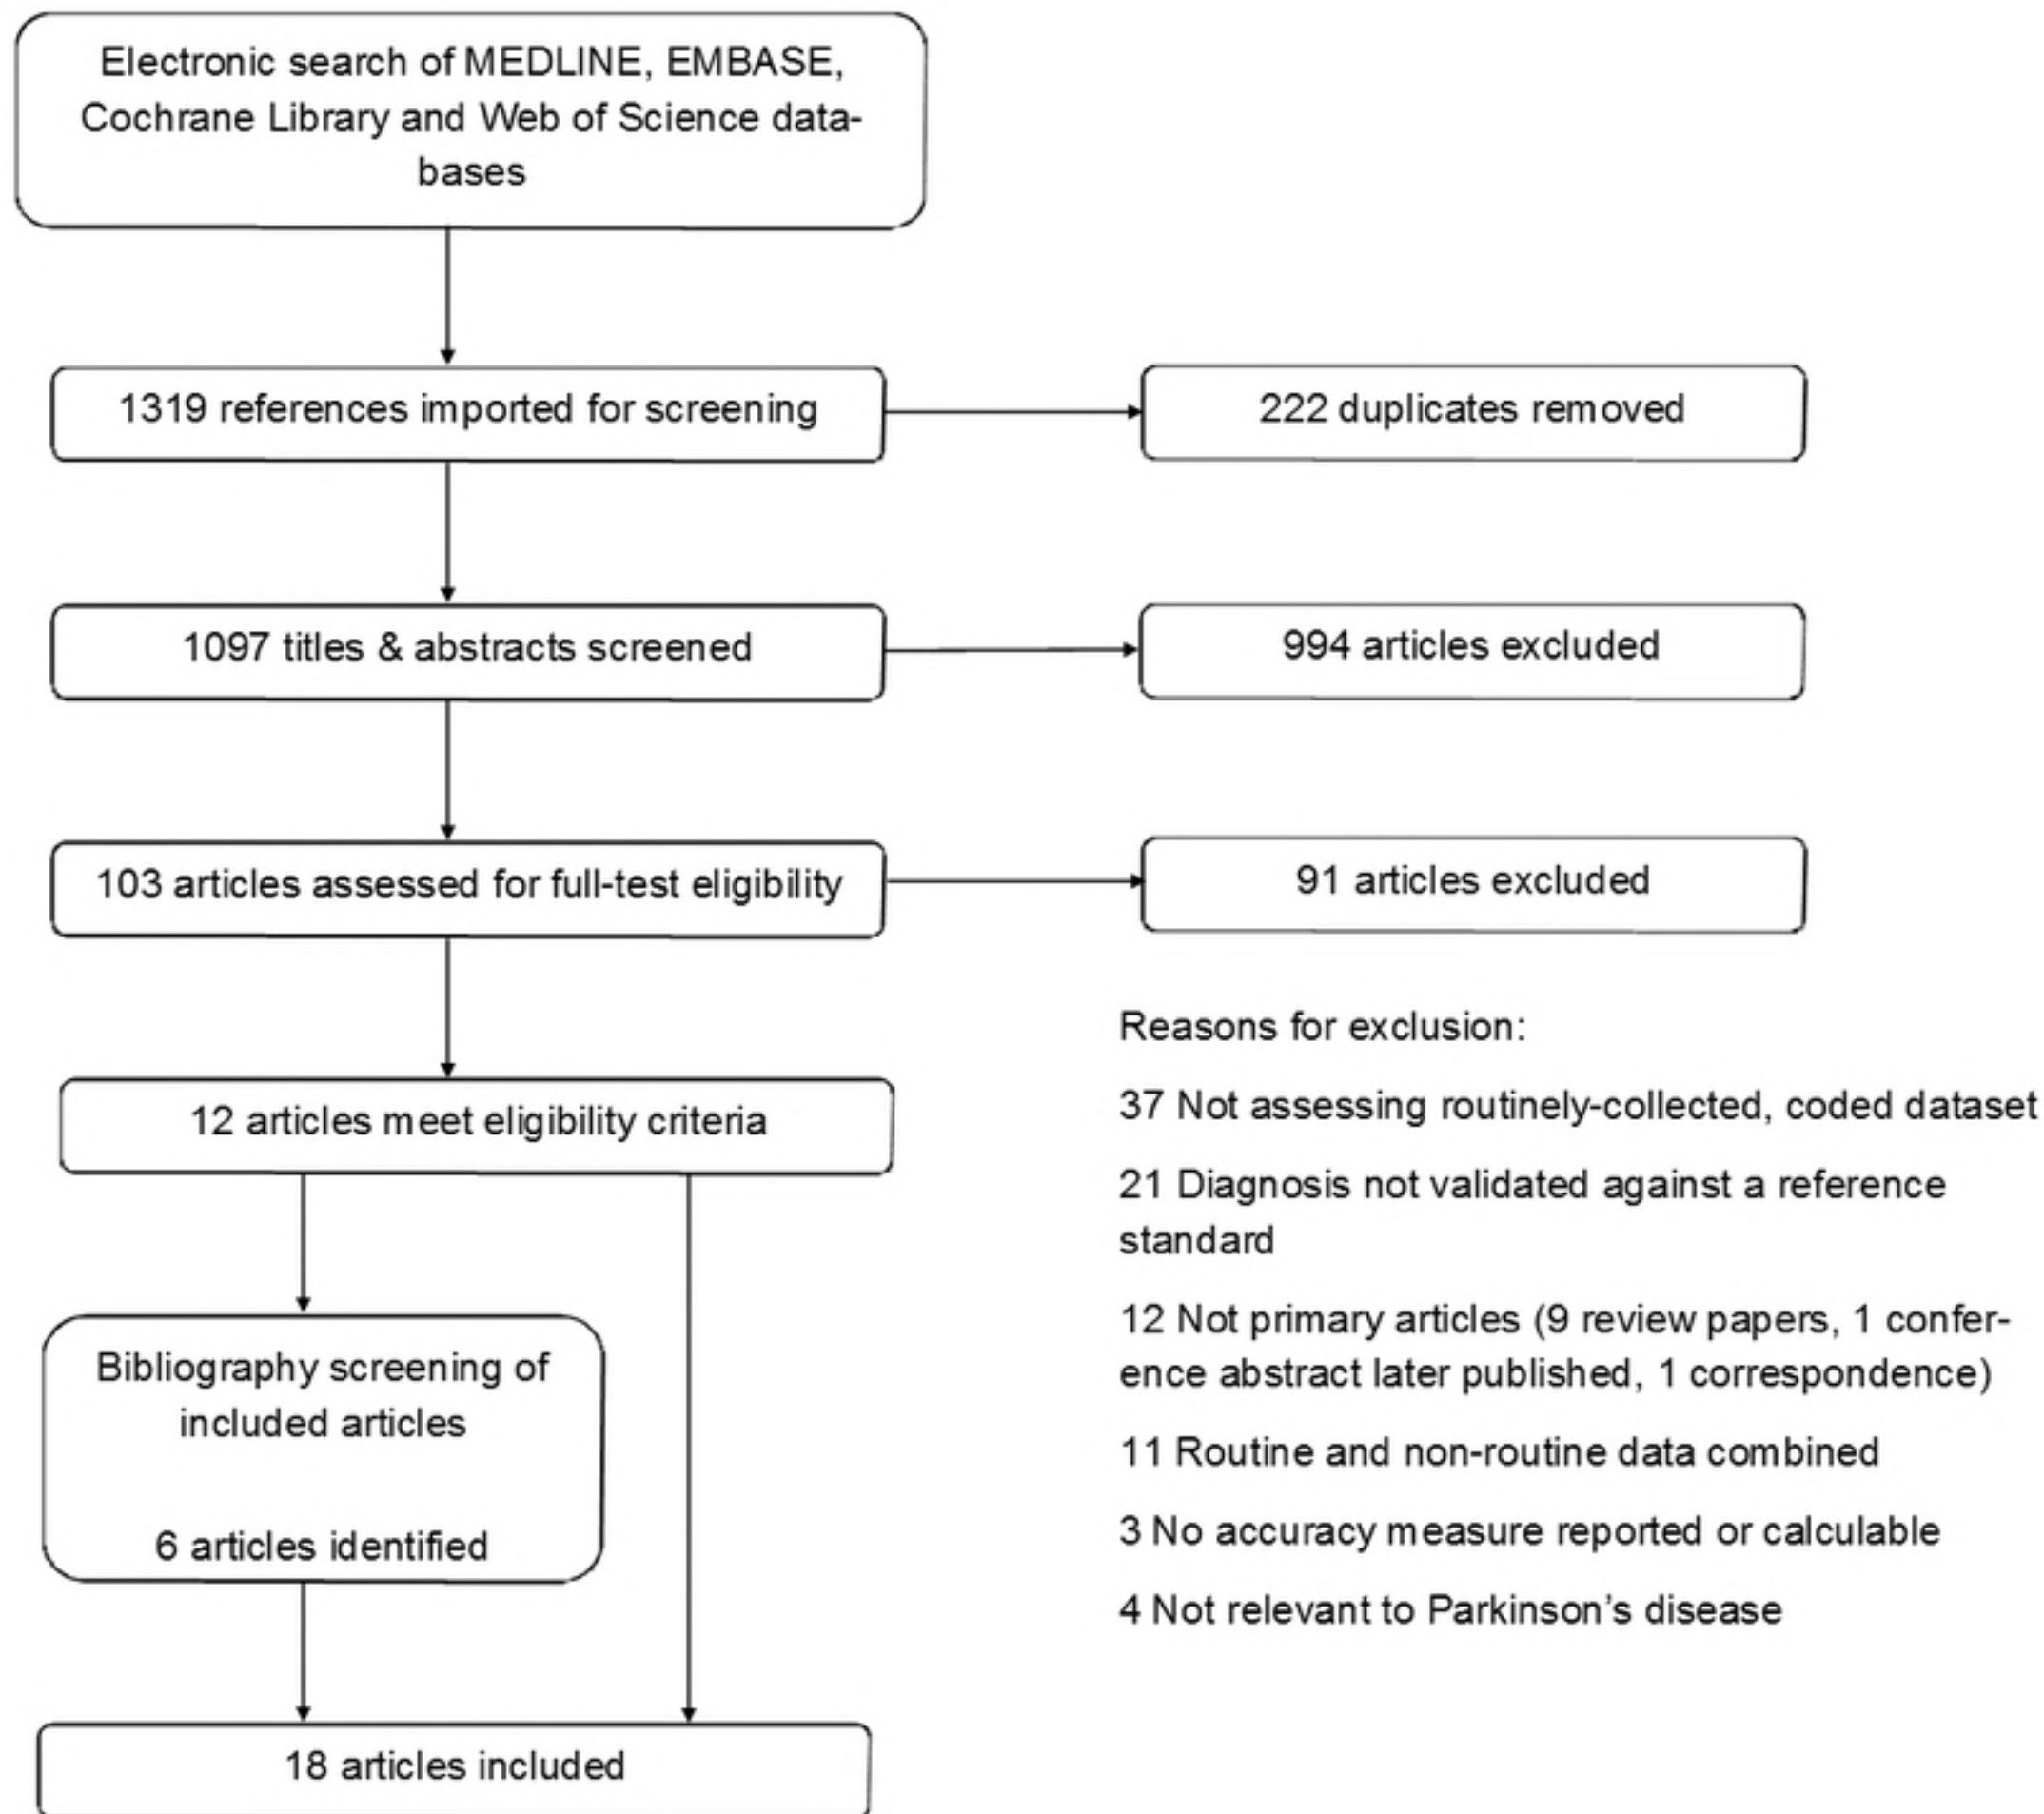

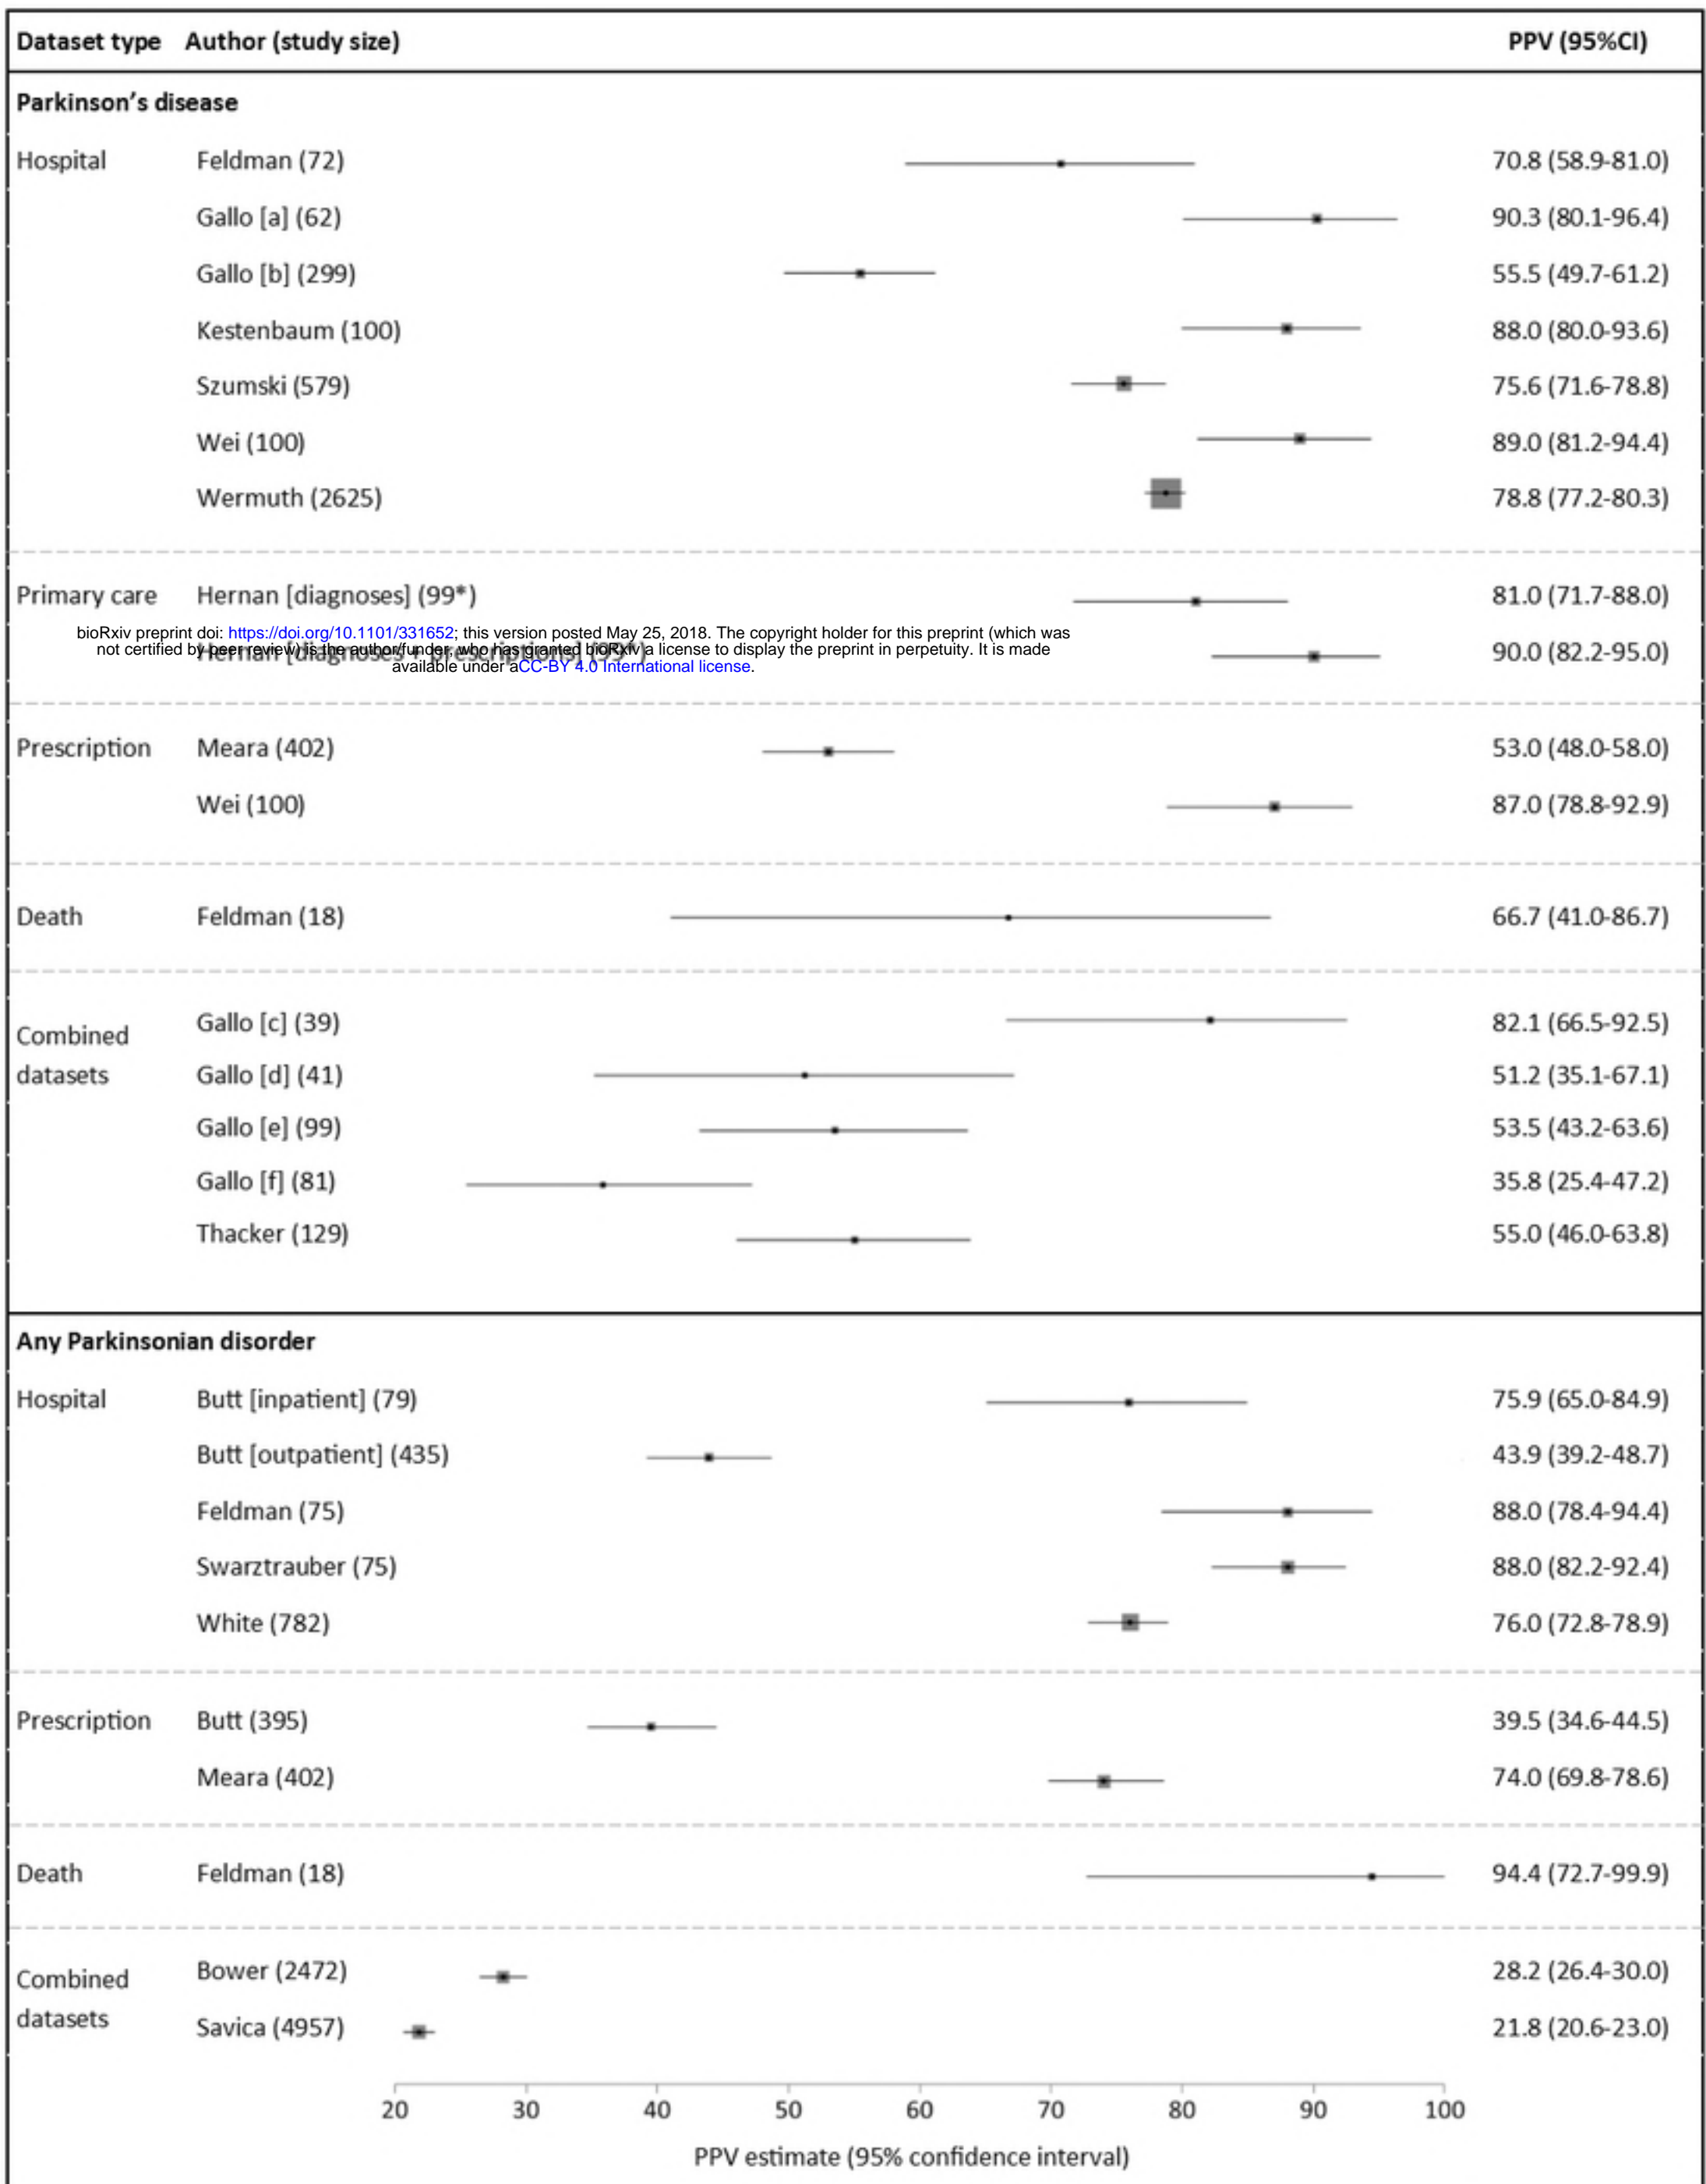

bioRxiv preprint doi: <https://doi.org/10.1101/331652>; this version posted May 25, 2018. The copyright holder for this preprint (which was not certified by peer review) is the author/funder, who has granted bioRxiv a license to display the preprint in perpetuity. It is made available under aCC-BY 4.0 International license.

**Parkinson's disease**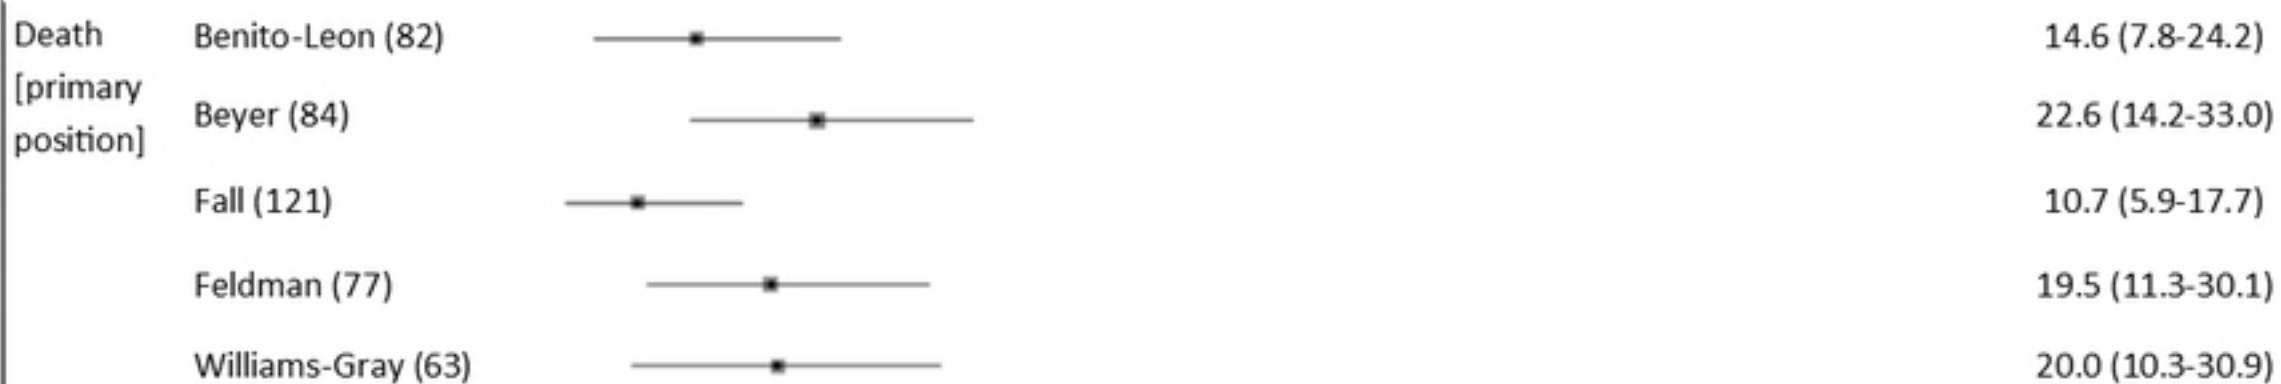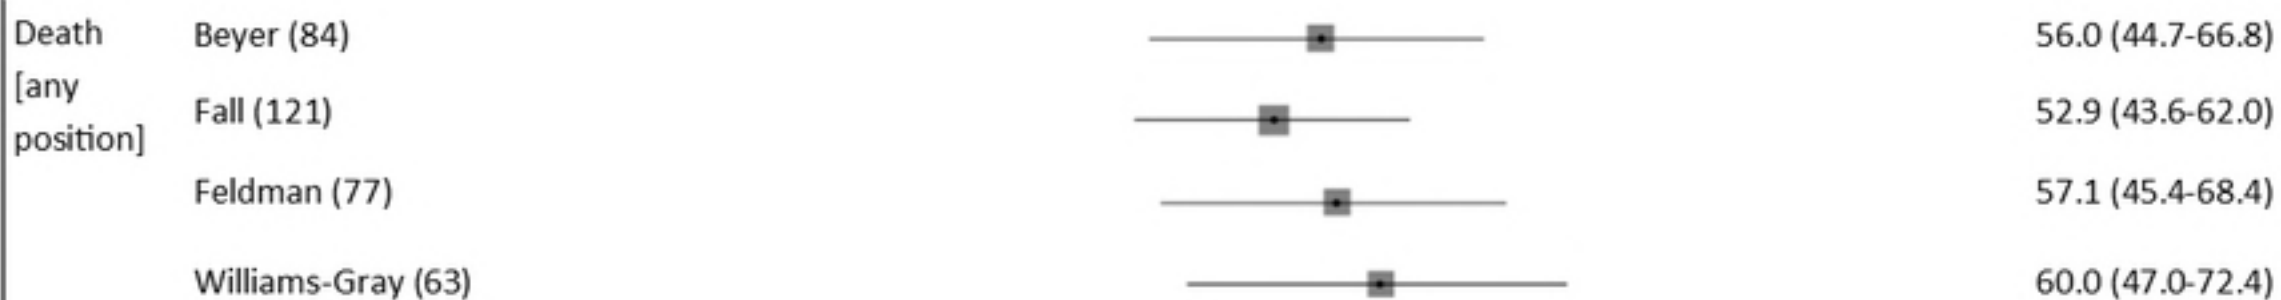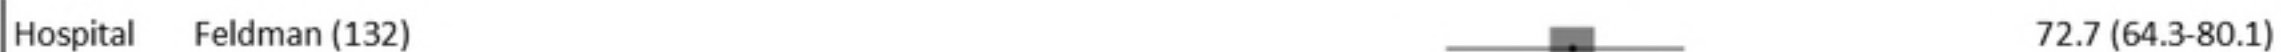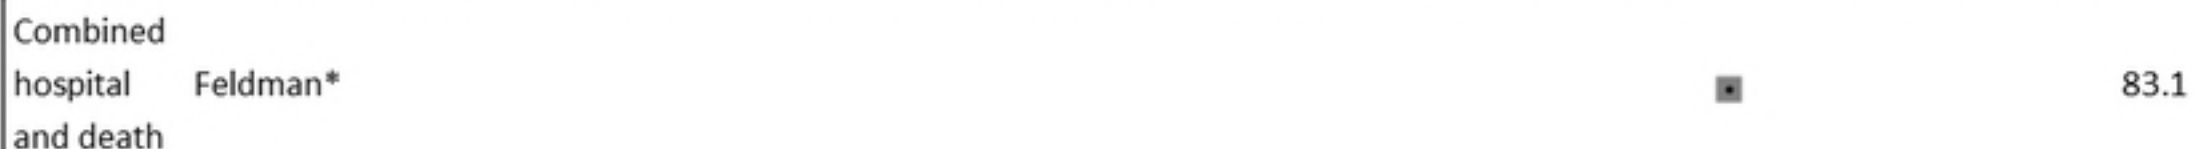**Any Parkinsonian disorder**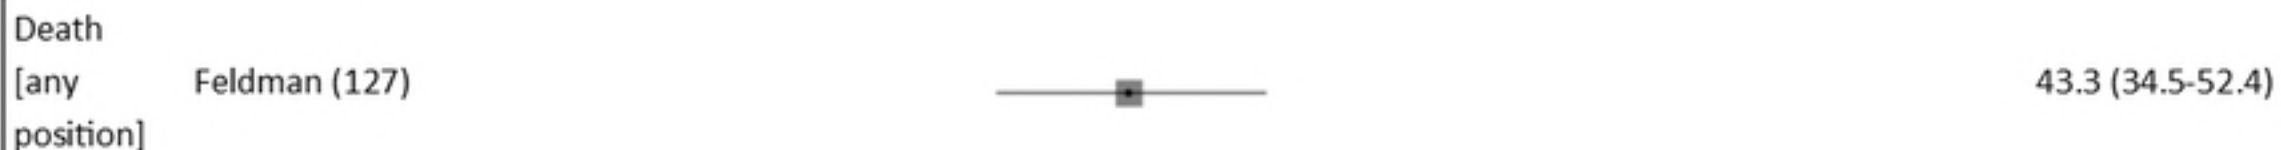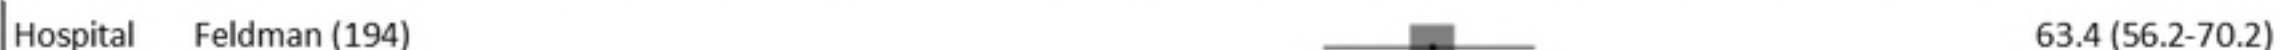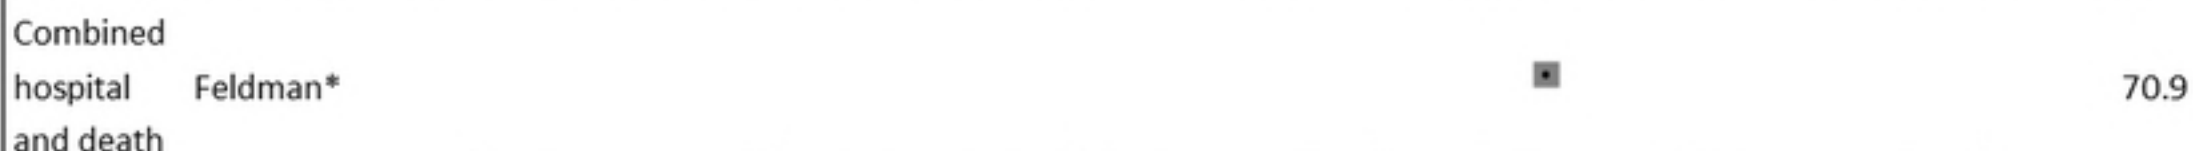

0 20 40 60 80 100

Sensitivity estimate (95% confidence interval)
